# Supplementary material for: Globally representative evidence on the actual and perceived support for climate action
Source: Springer Nature journal article supplement (doi:10.1038/s41558-024-01925-3), 2024-02-09
Supplement: MOESM1 [file 41558_2024_1925_MOESM1_ESM.pdf]

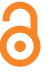

---

# Globally representative evidence on the actual and perceived support for climate action

---

In the format provided by the authors and unedited

---

# Supplementary Information

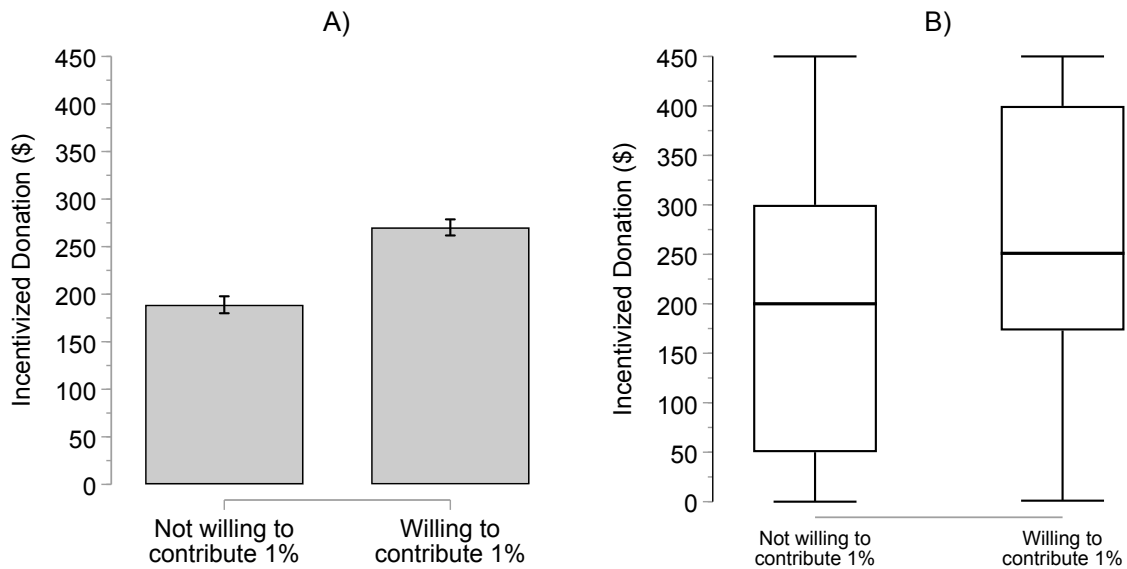

**Figure S1: Willingness to contribute 1% and donations to a pro-climate charity**

This figure presents data from Andre et al. (2022)<sup>30</sup> ( $N = 2000$ ). See Methods for details about the data collection. US respondents were asked whether they would be willing to contribute 1% of their income for the fight against climate change (yes/no). We also measure incentivized donations to a pro-climate charity. Specifically, respondents are asked to divide \$450 between themselves and a charitable organization that fights global warming. Panel A of this figure presents the average amount that respondents allocated to the pro-climate charity separately for respondents who say that they would be willing to contribute 1% of their income (yes) and those who were not willing to contribute 1% of their income (no). The mean difference in donations across groups is \$81 (95%-CI: [69.1, 93.6],  $p$ -value < 0.001 for a two-sided  $t$ -test,  $N = 1,993$ ). 95% confidence intervals are shown. Panel B of this figure presents a corresponding boxplot that indicates the median as a black solid line, 25th and 75th percentile as a box, and the maximum and minimum of the distribution as whiskers ( $N = 1,993$ ).

Table S1: Correlation between willingness to contribute and concrete climate-friendly behaviors

| Correlation coefficients ( $\rho$ ):             | Willingness to contribute |
|--------------------------------------------------|---------------------------|
| Restrict meat consumption                        | 0.338<br>( $<0.001$ )     |
| Avoid taking flights                             | 0.210<br>( $<0.001$ )     |
| Use environmentally-friendly alternatives to car | 0.385<br>( $<0.001$ )     |
| Receive electricity from green sources           | 0.346<br>( $<0.001$ )     |
| Adapt shopping behavior                          | 0.365<br>( $<0.001$ )     |

*Notes:* This table shows correlation coefficients using data from Andre et al. (2022)<sup>30</sup> ( $N = 1,996$ ). See Methods for details about the data collection. Specifically, the table presents univariate correlations between a binary indicator taking value one for respondents who say that they are willing to contribute 1% of their income for the fight against climate change (yes/no) and a set of binary indicators for whether respondents report to have engaged in concrete climate-friendly behaviors in the previous twelve months (yes/no). 45% of US respondents in Andre et al. (2022)<sup>30</sup> are willing to contribute 1% of their income, while 48% of respondents in our US sample from the World Poll are willing to contribute 1% of their income ( $p$ -value = 0.109, two-sided  $t$ -test).  $p$ -values from a two-sided  $t$ -test are shown in parentheses ( $N = 1,996$ ).

Table S2: Correlation between approval of general and specific pro-climate norms

| Correlation coefficients ( $\rho$ ):                    | Should try<br>to fight global warming |
|---------------------------------------------------------|---------------------------------------|
| Should restrict meat consumption                        | 0.380<br>( $<0.001$ )                 |
| Should avoid taking flights                             | 0.353<br>( $<0.001$ )                 |
| Should use environmentally-friendly alternatives to car | 0.510<br>( $<0.001$ )                 |
| Should receive electricity from green sources           | 0.446<br>( $<0.001$ )                 |
| Should adapt shopping behavior                          | 0.499<br>( $<0.001$ )                 |

*Notes:* This table shows correlation coefficients using data from Andre et al. (2022)<sup>30</sup> ( $N = 1,996$ ). See Methods for details about the data collection. Specifically, the table presents univariate correlations between a binary indicator taking value one for respondents who approve of a general pro-climate norm that people should try to fight global warming (yes/no) and a set of binary indicators for whether they approve of specific pro-climate norms (yes/no). 79% of US respondents in Andre et al. (2022)<sup>30</sup> approve of pro-climate norms, while 79% of respondents in our US sample from the World Poll approve of pro-climate norms elicited in a comparable way ( $p$ -value = 0.782, two-sided  $t$ -test).  $p$ -values from a two-sided  $t$ -test are shown in parentheses ( $N = 1,996$ ).

Table S3: Correlation between demand for political action and support for concrete climate change policies

| Correlation coefficients ( $\rho$ ):              | Government should do more to fight global warming |
|---------------------------------------------------|---------------------------------------------------|
| Fund research into renewables                     | 0.569<br>( $<0.001$ )                             |
| Regulate CO2 emissions as a pollutant             | 0.554<br>( $<0.001$ )                             |
| Set strict CO2 limits on coal-fired plants        | 0.594<br>( $<0.001$ )                             |
| Carbon tax on fossil fuel companies               | 0.584<br>( $<0.001$ )                             |
| Min. 20% of energy from renewable sources         | 0.550<br>( $<0.001$ )                             |
| Tax rebate for energy-efficient vehicle purchases | 0.486<br>( $<0.001$ )                             |

*Notes:* This table shows correlation coefficients using data from Andre et al. (2022)<sup>30</sup> ( $N = 1,996$ ). See Methods for details about the data collection. Specifically, the table presents univariate correlations between a binary indicator taking value one for respondents who say that the national government should do more to fight global warming (yes/no) and their support for specific climate change-related policies. 76% of US respondents in Andre et al. (2022)<sup>30</sup> say that the government should do more to fight global warming, while 74% of respondents in our US sample from the World Poll demand more political actions from their national governments ( $p$ -value = 0.188, two-sided  $t$ -test). Support for these policies is measured on a 4-point Likert scale ranging from “Strongly support” to “Strongly oppose.”  $p$ -values from a two-sided  $t$ -test are shown in parentheses ( $N = 1,996$ ).

Table S4: National averages

| Country              | Willingness to contribute 1% | Approval of pro-climate norms | Demand for political action | Beliefs about others' WTC | Belief that a majority is WTC |
|----------------------|------------------------------|-------------------------------|-----------------------------|---------------------------|-------------------------------|
| Myanmar              | 92.8                         | 95.4                          | –                           | 60.2                      | 52.2                          |
| Uzbekistan           | 91.6                         | 95.9                          | 93.0                        | 62.5                      | 51.5                          |
| Mongolia             | 89.6                         | 91.8                          | 92.7                        | 64.4                      | 53.9                          |
| Cambodia             | 87.4                         | 96.0                          | 96.1                        | 54.7                      | 43.0                          |
| Mali                 | 85.9                         | 94.4                          | 96.6                        | 42.1                      | 31.5                          |
| Paraguay             | 85.8                         | 95.0                          | 96.1                        | 47.5                      | 28.1                          |
| Laos                 | 85.3                         | 82.5                          | 87.1                        | 50.5                      | 35.3                          |
| Mauritius            | 85.1                         | 94.7                          | 97.1                        | 53.7                      | 42.0                          |
| Venezuela            | 85.0                         | 94.0                          | 96.1                        | 45.4                      | 30.8                          |
| Bolivia              | 84.6                         | 96.3                          | 97.9                        | 44.0                      | 28.5                          |
| Burkina Faso         | 84.4                         | 87.1                          | 90.1                        | 41.9                      | 29.1                          |
| Benin                | 84.3                         | 87.2                          | 93.0                        | 44.0                      | 31.3                          |
| Kosovo               | 84.2                         | 89.2                          | 93.2                        | 48.0                      | 33.1                          |
| Guinea               | 83.6                         | 88.2                          | 93.8                        | 39.3                      | 26.3                          |
| Ivory Coast          | 83.4                         | 86.4                          | 90.9                        | 43.7                      | 31.1                          |
| Nepal                | 83.0                         | 87.2                          | 91.0                        | 41.8                      | 26.3                          |
| Morocco              | 83.0                         | 86.1                          | 92.9                        | 54.0                      | 42.5                          |
| Sierra Leone         | 82.9                         | 81.6                          | 89.0                        | 44.2                      | 30.6                          |
| Dominican Republic   | 82.7                         | 87.5                          | 92.6                        | 43.3                      | 30.3                          |
| Bangladesh           | 82.6                         | 87.2                          | 94.0                        | 48.7                      | 36.9                          |
| Georgia              | 82.5                         | 91.0                          | 95.6                        | 51.3                      | 42.6                          |
| Cameroon             | 82.1                         | 81.2                          | 89.6                        | 42.8                      | 29.2                          |
| Afghanistan          | 82.0                         | 89.7                          | 88.5                        | 40.5                      | 27.2                          |
| United Arab Emirates | 81.7                         | 92.3                          | –                           | 53.9                      | 46.0                          |
| Bosnia Herzegovina   | 81.7                         | 85.8                          | 90.9                        | 41.0                      | 25.5                          |
| Zambia               | 81.4                         | 75.5                          | 86.4                        | 55.2                      | 47.5                          |
| Nicaragua            | 81.2                         | 93.2                          | 95.7                        | 46.2                      | 29.8                          |
| Gabon                | 81.1                         | 88.0                          | 89.4                        | 40.6                      | 26.1                          |
| China                | 80.9                         | 95.9                          | 97.1                        | 55.6                      | 48.4                          |
| Costa Rica           | 80.7                         | 95.1                          | 94.6                        | 44.5                      | 29.9                          |
| Philippines          | 80.6                         | 89.9                          | 94.1                        | 49.4                      | 32.7                          |
| Indonesia            | 80.0                         | 84.1                          | 86.5                        | 43.5                      | 26.9                          |
| Sri Lanka            | 79.9                         | 87.2                          | 94.6                        | 47.4                      | 37.7                          |
| Togo                 | 79.9                         | 92.3                          | 96.7                        | 38.6                      | 26.2                          |
| Kenya                | 79.0                         | 82.4                          | 92.7                        | 39.3                      | 22.4                          |
| Senegal              | 78.7                         | 90.5                          | 91.5                        | 47.8                      | 36.2                          |
| Tajikistan           | 78.0                         | 91.3                          | 95.1                        | 50.9                      | 37.1                          |
| Greece               | 77.8                         | 87.9                          | 92.6                        | 36.0                      | 23.1                          |
| Ecuador              | 77.6                         | 94.8                          | 95.9                        | 44.2                      | 29.8                          |
| Colombia             | 77.4                         | 95.1                          | 96.8                        | 50.1                      | 37.3                          |
| Saudi Arabia         | 77.2                         | 87.9                          | –                           | 52.5                      | 43.5                          |
| Peru                 | 77.2                         | 92.9                          | 96.2                        | 40.5                      | 23.8                          |
| Vietnam              | 77.1                         | 93.5                          | 96.9                        | 49.9                      | 41.2                          |
| Congo Brazzaville    | 76.7                         | 77.5                          | 84.2                        | 38.1                      | 25.0                          |
| North Macedonia      | 76.5                         | 89.2                          | 93.7                        | 40.9                      | 24.3                          |
| Cyprus               | 76.4                         | 93.8                          | 96.1                        | 37.5                      | 24.6                          |
| Serbia               | 76.3                         | 88.3                          | 89.9                        | 37.8                      | 21.9                          |
| Slovenia             | 76.1                         | 92.8                          | 91.0                        | 44.3                      | 32.9                          |
| Mozambique           | 75.8                         | 65.2                          | 68.5                        | 41.3                      | 28.3                          |
| Iran                 | 75.8                         | 91.3                          | 95.2                        | 44.3                      | 33.2                          |
| Mexico               | 75.4                         | 95.8                          | 96.3                        | 41.6                      | 26.5                          |
| Armenia              | 75.4                         | 82.7                          | 83.9                        | 40.7                      | 26.1                          |
| Uganda               | 74.6                         | 88.5                          | 93.6                        | 38.1                      | 23.0                          |
| Hungary              | 73.2                         | 90.6                          | 88.3                        | 36.9                      | 21.7                          |
| Kyrgyzstan           | 73.0                         | 85.4                          | 86.5                        | 53.2                      | 40.1                          |
| El Salvador          | 72.9                         | 92.3                          | 92.4                        | 43.3                      | 26.6                          |

Table S4: National averages

| Country        | Willingness to contribute 1% | Approval of pro-climate norms | Demand for political action | Beliefs about others' WTC | Belief that a majority is WTC |
|----------------|------------------------------|-------------------------------|-----------------------------|---------------------------|-------------------------------|
| Austria        | 72.7                         | 87.0                          | 84.5                        | 37.9                      | 21.6                          |
| Zimbabwe       | 72.1                         | 56.0                          | 67.5                        | 41.7                      | 24.5                          |
| Denmark        | 72.0                         | 91.0                          | 72.7                        | 46.3                      | 35.3                          |
| Panama         | 72.0                         | 89.8                          | 92.9                        | 38.5                      | 19.2                          |
| Guatemala      | 72.0                         | 89.8                          | 90.3                        | 41.4                      | 20.3                          |
| Ghana          | 71.8                         | 84.2                          | 89.4                        | 40.5                      | 24.5                          |
| Iceland        | 71.8                         | 91.5                          | 80.9                        | 43.6                      | 31.1                          |
| Sweden         | 71.8                         | 91.1                          | 84.6                        | 43.6                      | 32.7                          |
| Malawi         | 71.3                         | 63.7                          | 75.6                        | 39.1                      | 21.2                          |
| Albania        | 71.3                         | 86.9                          | 92.8                        | 43.8                      | 29.0                          |
| Botswana       | 71.2                         | 85.1                          | 91.5                        | 49.0                      | 34.3                          |
| South Korea    | 70.9                         | 91.9                          | 93.6                        | 34.5                      | 20.6                          |
| Madagascar     | 70.5                         | 76.7                          | 83.2                        | 34.2                      | 17.8                          |
| Bulgaria       | 70.4                         | 88.4                          | 91.3                        | 33.0                      | 16.3                          |
| Croatia        | 70.0                         | 85.5                          | 83.1                        | 36.7                      | 21.4                          |
| Jamaica        | 69.9                         | 83.5                          | 93.3                        | 34.5                      | 18.8                          |
| Romania        | 69.4                         | 89.1                          | 94.0                        | 32.7                      | 17.1                          |
| Malta          | 68.5                         | 91.9                          | 92.9                        | 40.7                      | 24.0                          |
| Germany        | 67.9                         | 90.4                          | 85.9                        | 39.5                      | 22.9                          |
| Switzerland    | 67.8                         | 91.5                          | 83.8                        | 41.3                      | 26.5                          |
| Slovakia       | 67.8                         | 92.2                          | 88.6                        | 33.3                      | 16.2                          |
| Nigeria        | 67.3                         | 79.4                          | 89.2                        | 39.4                      | 24.8                          |
| Brazil         | 67.3                         | 92.5                          | 95.0                        | 42.6                      | 29.5                          |
| Norway         | 67.1                         | 90.8                          | 76.5                        | 41.7                      | 28.4                          |
| Malaysia       | 66.9                         | 91.7                          | 96.2                        | 40.0                      | 23.0                          |
| Turkey         | 66.4                         | 82.9                          | 89.0                        | 40.4                      | 28.6                          |
| Netherlands    | 65.6                         | 86.1                          | 81.8                        | 41.9                      | 31.1                          |
| Uruguay        | 65.5                         | 89.9                          | 90.1                        | 40.4                      | 25.5                          |
| Hong Kong      | 65.4                         | 92.9                          | 94.6                        | 30.5                      | 15.6                          |
| Iraq           | 65.4                         | 69.1                          | 72.8                        | 38.1                      | 24.7                          |
| Moldova        | 65.1                         | 79.1                          | 91.3                        | 39.5                      | 24.5                          |
| Spain          | 65.1                         | 86.5                          | 88.4                        | 40.6                      | 26.3                          |
| Ireland        | 65.0                         | 89.2                          | 87.7                        | 37.3                      | 20.5                          |
| Chile          | 64.9                         | 97.3                          | 98.2                        | 36.0                      | 19.3                          |
| Poland         | 64.2                         | 46.9                          | 86.2                        | 37.9                      | 22.4                          |
| India          | 64.0                         | 77.1                          | 80.0                        | 36.1                      | 20.0                          |
| Tanzania       | 63.7                         | 69.6                          | 81.6                        | 45.0                      | 29.5                          |
| Italy          | 63.7                         | 92.0                          | 92.8                        | 39.0                      | 27.2                          |
| Namibia        | 62.5                         | 86.5                          | 90.0                        | 37.1                      | 20.7                          |
| Taiwan         | 62.4                         | 92.9                          | 94.7                        | 30.3                      | 15.2                          |
| Jordan         | 62.3                         | 77.1                          | 85.9                        | 33.8                      | 22.9                          |
| Argentina      | 62.2                         | 91.6                          | 93.0                        | 38.1                      | 22.9                          |
| Belgium        | 61.4                         | 90.7                          | 89.8                        | 37.7                      | 25.0                          |
| Ukraine        | 59.4                         | 83.5                          | 86.0                        | 32.5                      | 15.5                          |
| Lebanon        | 59.4                         | 67.1                          | 74.2                        | 40.9                      | 26.6                          |
| Honduras       | 58.8                         | 88.7                          | 89.5                        | 41.4                      | 21.8                          |
| Tunisia        | 58.4                         | 62.4                          | 83.5                        | 36.2                      | 23.6                          |
| Thailand       | 58.3                         | 91.9                          | 93.2                        | 46.3                      | 32.3                          |
| Portugal       | 58.0                         | 96.9                          | 95.5                        | 40.5                      | 24.2                          |
| Australia      | 56.1                         | 85.3                          | 83.3                        | 38.6                      | 25.0                          |
| Czech Republic | 54.9                         | 87.2                          | 87.6                        | 32.3                      | 13.7                          |
| Finland        | 54.6                         | 87.3                          | 61.9                        | 36.2                      | 21.5                          |
| Algeria        | 54.6                         | 80.1                          | 90.4                        | 40.0                      | 26.6                          |
| Latvia         | 54.5                         | 77.1                          | 76.7                        | 31.0                      | 13.9                          |
| South Africa   | 54.2                         | 80.6                          | 88.5                        | 34.1                      | 19.8                          |
| Estonia        | 53.7                         | 78.9                          | 70.1                        | 36.0                      | 18.1                          |

Table S4: National averages

| Country        | Willingness to contribute 1% | Approval of pro-climate norms | Demand for political action | Beliefs about others' WTC | Belief that a majority is WTC |
|----------------|------------------------------|-------------------------------|-----------------------------|---------------------------|-------------------------------|
| Singapore      | 53.1                         | 91.4                          | 93.0                        | 35.1                      | 21.0                          |
| France         | 51.1                         | 87.8                          | 85.1                        | 38.5                      | 25.5                          |
| Japan          | 48.8                         | 87.7                          | 85.7                        | 24.2                      | 8.1                           |
| Canada         | 48.7                         | 86.9                          | 82.5                        | 34.2                      | 19.6                          |
| United States  | 48.1                         | 78.7                          | 74.0                        | 33.2                      | 16.4                          |
| United Kingdom | 47.6                         | 86.5                          | 83.4                        | 37.2                      | 21.8                          |
| Pakistan       | 47.4                         | 77.3                          | 80.7                        | 30.7                      | 15.6                          |
| New Zealand    | 46.4                         | 84.0                          | 73.7                        | 35.9                      | 22.3                          |
| Kazakhstan     | 45.0                         | 70.8                          | 78.7                        | 38.2                      | 25.0                          |
| Russia         | 41.0                         | 71.4                          | 78.6                        | 29.4                      | 13.7                          |
| Lithuania      | 40.6                         | 85.5                          | 88.7                        | 25.8                      | 8.7                           |
| Israel         | 37.3                         | 75.7                          | 89.5                        | 19.5                      | 5.4                           |
| Egypt          | 30.5                         | 63.3                          | 84.0                        | 27.4                      | 13.1                          |
| World          | 68.5                         | 86.2                          | 88.6                        | 42.8                      | 29.9                          |

*Notes:* This table presents national averages for the willingness to contribute 1% of one's household income, the approval of pro-climate norms, the demand for political action, and beliefs about others' willingness to contribute. The final column presents the share of respondents in a country that believe that of the people in their country 50% or more are willing to contribute 1% of their income. For each question, we derive the averages, after excluding missing responses to this specific question. National averages are obtained by weighting individual responses with Gallup's sampling weights to account for the stratified random sampling procedure. Global averages are derived as population-weighted averages of the national shares.



Table S5: Willingness to contribute across world regions

|                              | Willingness to contribute 1%<br>(1) | Countries<br>(2) |
|------------------------------|-------------------------------------|------------------|
| South and East Asia          | 72.2%                               | 21               |
| South America                | 72.0%                               | 19               |
| Sub-Saharan Africa           | 71.5%                               | 25               |
| Western Europe               | 61.7%                               | 22               |
| North Africa and Middle East | 61.5%                               | 12               |
| Eastern Europe               | 56.1%                               | 22               |
| Australia and New Zealand    | 54.5%                               | 2                |
| North America                | 48.2%                               | 2                |
| World                        | 68.5%                               | 125              |

*Notes:* This table presents the share of individuals willing to contribute 1% of one's household income (in %) for different world regions and groups of countries. The regional averages are derived as population-weighted averages of the national shares (see Supp. Tab. S4). We further report the number of surveyed countries that belong to each group.

Table S6: Cross-country variation in willingness to contribute

|                                 | Dependent variable: Willingness to contribute |                     |                      |                      |
|---------------------------------|-----------------------------------------------|---------------------|----------------------|----------------------|
|                                 | (1)                                           | (2)                 | (3)                  | (4)                  |
| Log GDP (per capita, PPP)       | -5.462***<br>(0.809)                          |                     | -6.253***<br>(1.433) | -4.735***<br>(1.669) |
| Annual temperature (°C)         |                                               | 0.523***<br>(0.134) | 0.397**<br>(0.173)   | 0.485**<br>(0.232)   |
| Precipitation (mm per year)     |                                               |                     |                      | 0.003*<br>(0.002)    |
| Distance to coast (in 1,000 km) |                                               |                     |                      | 3.129<br>(4.119)     |
| Terrain ruggedness index        |                                               |                     |                      | 1.955**<br>(0.843)   |
| Countries                       | 125                                           | 125                 | 125                  | 121                  |
| R <sup>2</sup>                  | 0.219                                         | 0.119               | 0.299                | 0.341                |
| Continent fixed effects         |                                               |                     | Yes                  | Yes                  |

*Notes:* This table shows OLS regression estimates where the unit of observation is a country. The dependent variable is the national share of respondents (ranging from 0 to 100) who are willing to contribute 1% of their income. National shares are obtained by weighting individual responses using Gallup’s sampling weights to account for the stratified random sampling procedure. We include continent fixed effects (Africa, Americas, Asia, Europe, Oceania) in columns 3 and 4. We do not estimate a joint multivariate regression with the IPCC vulnerability index *and* log GDP and annual temperature as regressors because the IPCC vulnerability index is highly collinear with log GDP and temperature. In the text, we use the IPCC vulnerability index as a comprehensive summary measure of a country’s vulnerability to climate change.

\*  $p < 0.10$ , \*\*  $p < 0.05$ , \*\*\*  $p < 0.01$ . Two-sided  $t$ -tests. Robust standard errors in parentheses.

Table S7: Cross-country variation in willingness to contribute: Economic factors

|                                   | Dependent variable: Willingness to contribute (%) |                     |
|-----------------------------------|---------------------------------------------------|---------------------|
|                                   | (1)                                               | (2)                 |
| Log GDP (per capita, PPP)         | -6.253***<br>(1.433)                              | -6.793**<br>(2.618) |
| Annual temperature (°C)           | 0.397**<br>(0.173)                                | 0.448**<br>(0.208)  |
| Secondary education (share)       |                                                   | 4.278<br>(9.399)    |
| Tertiary education (share)        |                                                   | 16.093<br>(17.395)  |
| Average growth rate (2000-2019)   |                                                   | 70.291<br>(79.943)  |
| Scientific articles (per capita)  |                                                   | 7.788<br>(388.443)  |
| Electricity from fossil fuels (%) |                                                   | 1.207<br>(3.881)    |
| N                                 | 125                                               | 112                 |
| R <sup>2</sup>                    | 0.299                                             | 0.273               |
| Continent fixed effects           | Yes                                               | Yes                 |

*Notes:* This table shows OLS regression estimates where the unit of observation is a country. The dependent variable is the national share of respondents (from 0 to 100) who are willing to contribute 1% of their income. National shares are obtained by weighting responses using Gallup's sampling weights to account for the stratified random sampling procedure. All regressions include continent fixed effects (Africa, Americas, Asia, Europe, Oceania).

\*  $p < 0.10$ , \*\*  $p < 0.05$ , \*\*\*  $p < 0.01$ . Two-sided  $t$ -tests. Robust standard errors in parentheses.

Table S8: Cross-country variation in willingness to contribute: Political factors

|                                         | Dependent variable: Willingness to contribute (%) |                     |
|-----------------------------------------|---------------------------------------------------|---------------------|
|                                         | (1)                                               | (2)                 |
| Log GDP (per capita, PPP)               | -6.253***<br>(1.433)                              | -5.903**<br>(2.574) |
| Annual temperature (°C)                 | 0.397**<br>(0.173)                                | 0.379**<br>(0.184)  |
| Democracy (binary)                      |                                                   | 2.039<br>(3.413)    |
| Property rights (std.)                  |                                                   | -2.080<br>(2.512)   |
| Perceived corruption (std.)             |                                                   | 1.872<br>(2.184)    |
| Concentration of political power (std.) |                                                   | -1.934*<br>(1.122)  |
| N                                       | 125                                               | 122                 |
| R <sup>2</sup>                          | 0.299                                             | 0.321               |
| Continent fixed effects                 | Yes                                               | Yes                 |

*Notes:* This table shows OLS regression estimates where the unit of observation is a country. The dependent variable is the national share of respondents (from 0 to 100) who are willing to contribute 1% of their income. National shares are obtained by weighting responses using Gallup's sampling weights to account for the stratified random sampling procedure. All regressions include continent fixed effects (Africa, Americas, Asia, Europe, Oceania).

\*  $p < 0.10$ , \*\*  $p < 0.05$ , \*\*\*  $p < 0.01$ . Two-sided  $t$ -tests. Robust standard errors in parentheses.

Table S9: Cross-country variation in willingness to contribute: Cultural factors

|                                            | Dependent variable: Willingness to contribute (%) |                     |
|--------------------------------------------|---------------------------------------------------|---------------------|
|                                            | (1)                                               | (2)                 |
| Annual temperature (°C)                    | 0.397**<br>(0.173)                                | 0.512**<br>(0.196)  |
| Log GDP (per capita, PPP)                  | -6.253***<br>(1.433)                              | -6.094**<br>(2.575) |
| Individualism-collectivism (std.)          |                                                   | 4.375<br>(3.642)    |
| Traditional vs. secular values (std.)      |                                                   | -3.458<br>(2.247)   |
| Survival vs. self-expression values (std.) |                                                   | 2.436<br>(2.642)    |
| Kinship tightness (std.)                   |                                                   | 2.344*<br>(1.232)   |
| N                                          | 125                                               | 84                  |
| R <sup>2</sup>                             | 0.299                                             | 0.339               |
| Continent fixed effects                    | Yes                                               | Yes                 |

*Notes:* This table shows OLS regression estimates where the unit of observation is a country. The dependent variable is the national share of respondents (from 0 to 100) who are willing to contribute 1% of their income. National shares are obtained by weighting responses using Gallup's sampling weights to account for the stratified random sampling procedure. All regressions include continent fixed effects (Africa, Americas, Asia, Europe, Oceania).

\*  $p < 0.10$ , \*\*  $p < 0.05$ , \*\*\*  $p < 0.01$ . Two-sided  $t$ -tests. Robust standard errors in parentheses.

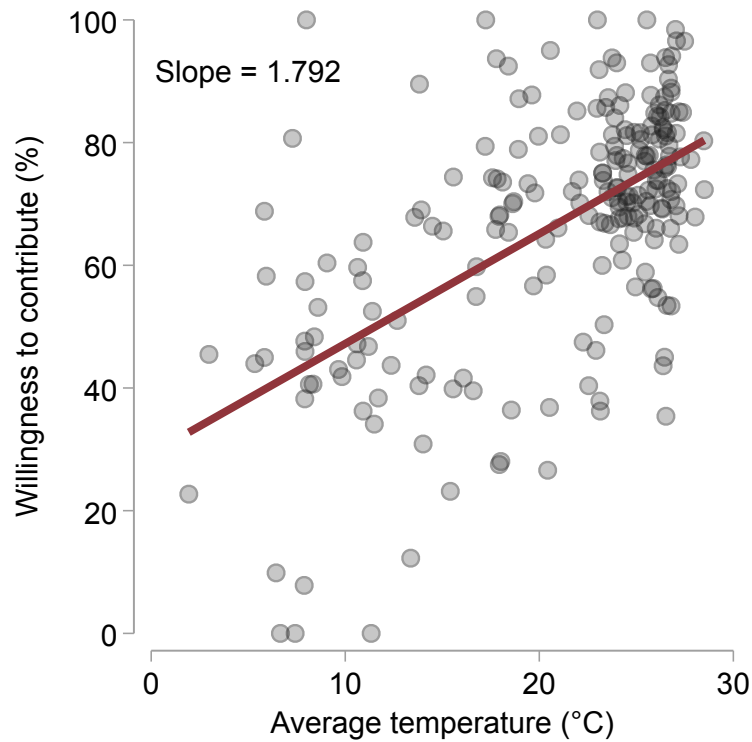

**Figure S2: Regional willingness to contribute and temperature in North America**

Scatter plot of the regional mean willingness to contribute (in %) and the regional average annual temperature (in °C, 2010-2019) in North America ( $p$ -value $<0.001$  for a two-sided  $t$ -test,  $N = 216$ ). Regions are defined by Gallup and usually correspond to the first administrative unit below the national level (e.g., states in the US).

Table S10: Cross-country variation in approval of pro-climate norms and demand for political action

|                           | (1)<br>Approval of<br>pro-climate norms (%) | (2)<br>Demand for<br>political action (%) |
|---------------------------|---------------------------------------------|-------------------------------------------|
| Log GDP (per capita, PPP) | 0.959<br>(0.907)                            | 0.065<br>(0.833)                          |
| Annual temperature (°C)   | 0.252**<br>(0.106)                          | 0.400***<br>(0.105)                       |
| N                         | 125                                         | 122                                       |
| R <sup>2</sup>            | 0.196                                       | 0.237                                     |
| Continent fixed effects   | Yes                                         | Yes                                       |

*Notes:* This table shows OLS regression estimates where the unit of observation is a country. The dependent variables are the approval of pro-climate norms (column 1, ranging from 0 to 100) and the demand for political action (column 2, ranging from 0 to 100). National shares are obtained by weighting individual responses using Gallup’s sampling weights to account for the stratified random sampling procedure. We include continent fixed effects (Africa, Americas, Asia, Europe, Oceania).

\*  $p < 0.10$ , \*\*  $p < 0.05$ , \*\*\*  $p < 0.01$ . Two-sided  $t$ -tests. Robust standard errors in parentheses.

Table S11: Willingness to contribute and beliefs about others' willingness to contribute

|                          | Dependent variable: Willingness to contribute (binary) |                     |
|--------------------------|--------------------------------------------------------|---------------------|
|                          | (1)                                                    | (2)                 |
| Belief about others' WTC | 0.455***<br>(0.022)                                    | 0.401***<br>(0.018) |
| R <sup>2</sup>           | 0.090                                                  | 0.143               |
| Individuals              | 111,134                                                | 111,134             |
| Countries                | 125                                                    | 125                 |
| Country fixed effects    |                                                        | Yes                 |

*Notes:* This table shows weighted least-squares regression estimates where the unit of observation is an individual respondent. The dependent variable is a binary indicator taking value one for respondents who are willing to contribute 1% of their income (yes/no). "Beliefs about others' WTC" are respondents' beliefs about the share of people in their country who would contribute 1% of their income (scaled from 0 to 1). We use Gallup's sampling weights to account for the stratified random sampling procedure. Standard errors are clustered at the country level.

\*  $p < 0.10$ , \*\*  $p < 0.05$ , \*\*\*  $p < 0.01$ . Two-sided  $t$ -tests. Robust standard errors in parentheses.



Table S12: National averages for WTC and perceived WTC after excluding missing responses to either of the two questions

| Country              | Willingness to contribute 1% | Beliefs about others' WTC |
|----------------------|------------------------------|---------------------------|
| Uzbekistan           | 93.6                         | 63.1                      |
| Myanmar              | 92.6                         | 60.4                      |
| Cambodia             | 91.9                         | 54.9                      |
| Mongolia             | 89.6                         | 64.7                      |
| Paraguay             | 89.2                         | 47.9                      |
| Laos                 | 89.0                         | 50.5                      |
| Zambia               | 87.6                         | 56.2                      |
| Bangladesh           | 87.6                         | 49.6                      |
| Mali                 | 87.1                         | 42.1                      |
| Georgia              | 87.1                         | 51.7                      |
| Dominican Republic   | 86.8                         | 43.5                      |
| Sierra Leone         | 86.8                         | 44.3                      |
| Bolivia              | 86.7                         | 44.0                      |
| Mauritius            | 86.6                         | 53.8                      |
| Burkina Faso         | 85.7                         | 42.5                      |
| Morocco              | 85.5                         | 54.6                      |
| Venezuela            | 85.5                         | 45.5                      |
| Benin                | 85.4                         | 44.1                      |
| Kosovo               | 85.2                         | 48.5                      |
| Nepal                | 84.7                         | 41.8                      |
| Afghanistan          | 84.6                         | 40.5                      |
| Nicaragua            | 84.2                         | 46.7                      |
| Bosnia Herzegovina   | 83.9                         | 41.1                      |
| Guinea               | 83.9                         | 39.7                      |
| United Arab Emirates | 83.8                         | 54.0                      |
| Ivory Coast          | 83.4                         | 43.9                      |
| Senegal              | 83.3                         | 47.8                      |
| Togo                 | 83.3                         | 38.8                      |
| Cameroon             | 83.2                         | 42.8                      |
| Costa Rica           | 82.6                         | 44.5                      |
| Sri Lanka            | 82.3                         | 48.1                      |
| Gabon                | 82.1                         | 40.6                      |
| Indonesia            | 81.8                         | 44.0                      |
| Tajikistan           | 81.6                         | 51.5                      |
| China                | 81.5                         | 55.6                      |
| El Salvador          | 81.4                         | 44.2                      |
| Philippines          | 81.2                         | 49.4                      |
| Peru                 | 81.0                         | 40.6                      |
| North Macedonia      | 81.0                         | 41.0                      |
| Vietnam              | 79.8                         | 51.2                      |
| Mozambique           | 79.4                         | 41.9                      |
| Ecuador              | 79.4                         | 44.3                      |
| Congo Brazzaville    | 79.4                         | 39.1                      |
| Kenya                | 79.3                         | 39.5                      |
| Panama               | 78.9                         | 39.1                      |
| Colombia             | 78.3                         | 50.0                      |
| Cyprus               | 78.3                         | 37.8                      |
| Armenia              | 78.2                         | 41.2                      |
| Greece               | 78.1                         | 36.2                      |
| Serbia               | 77.9                         | 38.4                      |
| Guatemala            | 77.8                         | 41.8                      |
| Saudi Arabia         | 77.5                         | 52.6                      |
| Kyrgyzstan           | 77.2                         | 53.8                      |
| Slovenia             | 77.1                         | 44.3                      |
| Mexico               | 76.6                         | 42.0                      |

Table S12: National averages for WTC and perceived WTC after excluding missing responses to either of the two questions

| Country        | Willingness to contribute 1% | Beliefs about others' WTC |
|----------------|------------------------------|---------------------------|
| Iran           | 76.5                         | 44.4                      |
| Uganda         | 75.1                         | 38.2                      |
| Ghana          | 74.9                         | 40.6                      |
| Jamaica        | 74.0                         | 34.7                      |
| Botswana       | 73.8                         | 49.4                      |
| Hungary        | 73.7                         | 37.0                      |
| Romania        | 73.5                         | 33.0                      |
| Malawi         | 73.4                         | 39.0                      |
| Austria        | 73.4                         | 38.1                      |
| Zimbabwe       | 73.4                         | 41.8                      |
| Nigeria        | 73.0                         | 39.4                      |
| Albania        | 72.9                         | 44.1                      |
| Iceland        | 72.4                         | 43.9                      |
| Croatia        | 72.2                         | 36.7                      |
| Sweden         | 72.2                         | 43.6                      |
| Madagascar     | 72.1                         | 34.3                      |
| Bulgaria       | 72.1                         | 33.1                      |
| Denmark        | 72.0                         | 46.4                      |
| India          | 72.0                         | 36.7                      |
| South Korea    | 71.6                         | 34.6                      |
| Tanzania       | 70.6                         | 45.0                      |
| Brazil         | 69.8                         | 42.6                      |
| Malta          | 69.6                         | 40.8                      |
| Malaysia       | 69.5                         | 40.2                      |
| Turkey         | 69.4                         | 40.3                      |
| Slovakia       | 68.7                         | 33.2                      |
| Switzerland    | 68.5                         | 41.4                      |
| Germany        | 68.1                         | 39.6                      |
| Uruguay        | 67.9                         | 40.4                      |
| Chile          | 67.3                         | 36.4                      |
| Iraq           | 67.0                         | 38.2                      |
| Norway         | 66.9                         | 41.7                      |
| Netherlands    | 65.8                         | 41.8                      |
| Hong Kong      | 65.6                         | 30.5                      |
| Honduras       | 65.5                         | 41.6                      |
| Spain          | 65.2                         | 40.6                      |
| Moldova        | 65.1                         | 39.8                      |
| Ireland        | 65.0                         | 37.4                      |
| Taiwan         | 64.7                         | 30.4                      |
| Namibia        | 64.6                         | 37.0                      |
| Poland         | 64.2                         | 37.9                      |
| Jordan         | 63.6                         | 33.6                      |
| Italy          | 63.6                         | 39.1                      |
| Argentina      | 63.5                         | 38.2                      |
| Belgium        | 62.8                         | 37.8                      |
| Thailand       | 62.3                         | 46.8                      |
| Lebanon        | 61.9                         | 41.0                      |
| Portugal       | 61.8                         | 40.5                      |
| Tunisia        | 61.8                         | 36.5                      |
| Ukraine        | 61.7                         | 32.6                      |
| South Africa   | 60.3                         | 34.0                      |
| Algeria        | 59.1                         | 40.7                      |
| Australia      | 57.1                         | 38.6                      |
| Czech Republic | 56.9                         | 32.4                      |
| Estonia        | 56.3                         | 36.3                      |

Table S12: National averages for WTC and perceived WTC after excluding missing responses to either of the two questions

| Country        | Willingness to contribute 1% | Beliefs about others' WTC |
|----------------|------------------------------|---------------------------|
| Singapore      | 55.6                         | 35.0                      |
| Finland        | 55.1                         | 36.3                      |
| Latvia         | 54.9                         | 31.7                      |
| Kazakhstan     | 53.1                         | 38.6                      |
| France         | 52.5                         | 38.1                      |
| Pakistan       | 50.3                         | 31.2                      |
| Japan          | 49.2                         | 24.4                      |
| Canada         | 49.0                         | 34.2                      |
| United States  | 48.7                         | 33.2                      |
| United Kingdom | 48.3                         | 37.2                      |
| New Zealand    | 47.0                         | 35.9                      |
| Lithuania      | 43.9                         | 26.3                      |
| Russia         | 41.9                         | 29.4                      |
| Israel         | 41.4                         | 19.4                      |
| Egypt          | 36.6                         | 27.8                      |
| World          | 71.3                         | 42.7                      |

*Notes:* This table presents national averages for the willingness to contribute 1% of one's household income and beliefs about others' willingness to contribute. For each question, we derive the averages, after excluding observations with missing responses to either of the two questions. National averages are obtained by weighting individual responses with Gallup's sampling weights to account for the stratified random sampling procedure. Global averages are derived as population-weighted averages of the national shares.

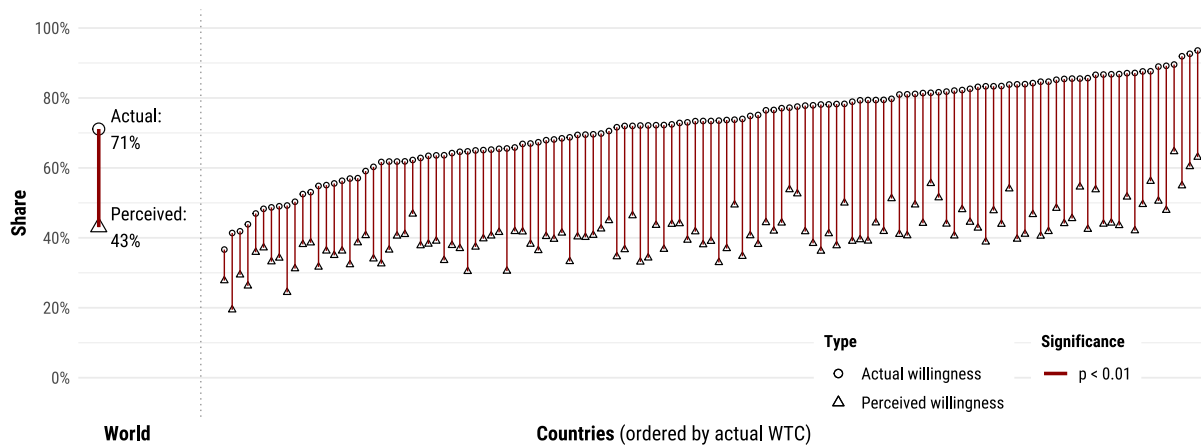

**Figure S3: Perception gaps: Estimates after excluding missing responses to either of the two questions**

Gap between the global/country shares of respondents who are willing to contribute 1% of their income (circles) and the global/country average perceived shares of others willing to contribute (triangles). We plot the estimates that we obtain if we drop all respondents with a missing response to either of the two questions. The reported significance levels result from two-sided  $t$ -tests testing whether the share of individuals who are willing to contribute is equal to the average perceived share. We use population-adjusted weights to derive the global averages and the standard sampling weights otherwise.

Table S13: Cross-country variation in the perception gap

|                                            | Dependent variable: Perception gap (in p.p.) |                      |                     |                     |
|--------------------------------------------|----------------------------------------------|----------------------|---------------------|---------------------|
|                                            | (1)                                          | (2)                  | (3)                 | (4)                 |
| Annual temperature (°C)                    | 0.382***<br>(0.098)                          | 0.387***<br>(0.115)  | 0.346***<br>(0.099) | 0.481***<br>(0.159) |
| Log GDP (per capita, PPP)                  | -3.902***<br>(0.925)                         | -4.630***<br>(1.753) | -3.581*<br>(1.826)  | -3.005<br>(1.808)   |
| Secondary education (share)                |                                              | 7.084<br>(6.066)     |                     |                     |
| Tertiary education (share)                 |                                              | 7.020<br>(10.314)    |                     |                     |
| Average growth rate (2000-2019)            |                                              | 12.286<br>(45.828)   |                     |                     |
| Scientific articles (per capita)           |                                              | 33.133<br>(192.709)  |                     |                     |
| Electricity from fossil fuels (%)          |                                              | 1.132<br>(2.359)     |                     |                     |
| Democracy (binary)                         |                                              |                      | 3.111<br>(2.133)    |                     |
| Property rights (std.)                     |                                              |                      | -1.333<br>(1.787)   |                     |
| Perceived corruption (std.)                |                                              |                      | 0.462<br>(1.458)    |                     |
| Concentration of political power (std.)    |                                              |                      | -0.892<br>(0.831)   |                     |
| Individualism-collectivism (std.)          |                                              |                      |                     | 3.020<br>(2.595)    |
| Traditional vs. secular values (std.)      |                                              |                      |                     | -0.086<br>(1.721)   |
| Survival vs. self-expression values (std.) |                                              |                      |                     | -0.937<br>(2.136)   |
| Kinship tightness (std.)                   |                                              |                      |                     | 1.551<br>(1.095)    |
| N                                          | 125                                          | 112                  | 122                 | 84                  |
| R <sup>2</sup>                             | 0.299                                        | 0.266                | 0.327               | 0.257               |
| Continent fixed effects                    | Yes                                          | Yes                  | Yes                 | Yes                 |

*Notes:* This table shows OLS regression estimates where the unit of observation is a country. The dependent variable is the perception gap, which is defined as the difference between the share of respondents willing to contribute 1% of their income (from 0 to 100) and the average belief about the share of others in their country who would contribute income (from 0 to 100). National shares are obtained by weighting responses using Gallup's sampling weights to account for the stratified random sampling procedure. All regressions include continent fixed effects (Africa, Americas, Asia, Europe, Oceania).

\*  $p < 0.10$ , \*\*  $p < 0.05$ , \*\*\*  $p < 0.01$ . Two-sided  $t$ -tests. Robust standard errors in parentheses.

Table S14: Global correlations across different facets of cooperation

|                               | Willingness to contribute<br>(1) | Approval of pro-climate norms<br>(2) | Demand for political action<br>(3) | Beliefs about others' WTC<br>(4) |
|-------------------------------|----------------------------------|--------------------------------------|------------------------------------|----------------------------------|
| Willingness to contribute     | 1.000                            |                                      |                                    |                                  |
| Approval of pro-climate norms | 0.379<br>(0.000)                 | 1.000                                |                                    |                                  |
| Demand for political action   | 0.469<br>(0.000)                 | 0.633<br>(0.000)                     | 1.000                              |                                  |
| Beliefs about others' WTC     | 0.723<br>(0.000)                 | 0.300<br>(0.001)                     | 0.300<br>(0.001)                   | 1.000                            |

*Notes:* This table displays univariate correlations between the different facets of cooperation across countries. National averages are obtained by weighting individual responses using Gallup's sampling weights to account for the stratified random sampling procedure.  $p$ -values from two-sided  $t$ -tests in parentheses ( $N = 125$ ).

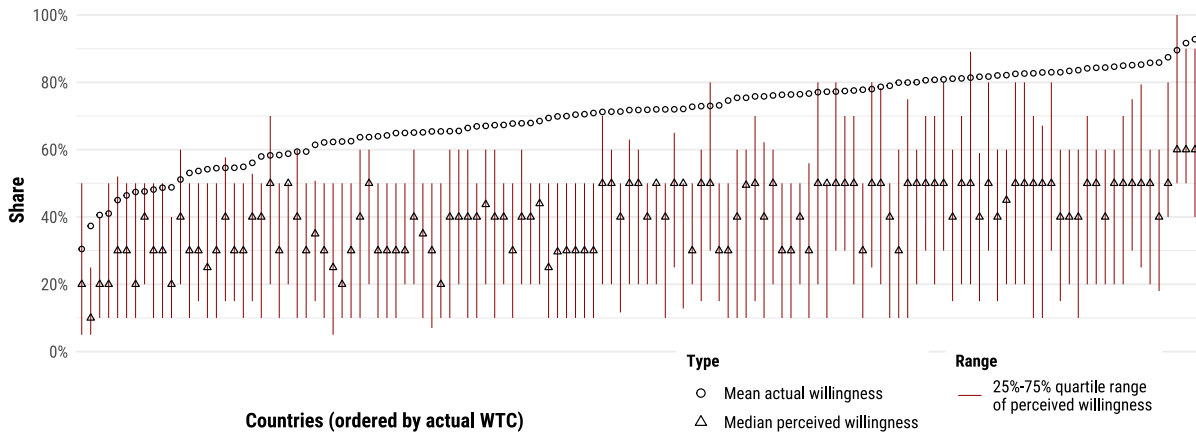

**Figure S4: Quartile range of the perceived willingness to contribute**

25%–75% quartile range of perceived willingness to contribute (red line) with the median belief (triangle) for each country. The actual mean shares of respondents who are willing to contribute 1% of their income are indicated by circles. We use the standard sampling weights to derive the means, medians, and quartiles.

Table S15: Overview of country samples and interview modes

| Country                | Date of data collection     | Sample size | Interview mode                    | Languages                       | Exceptions                                                                                                                                                                                    |
|------------------------|-----------------------------|-------------|-----------------------------------|---------------------------------|-----------------------------------------------------------------------------------------------------------------------------------------------------------------------------------------------|
| Afghanistan            | Aug 8 – Sep 29, 2021        | 1000        | Face-to-Face and Paper and Pencil | Dari, Pashto                    | Gender-matched sampling was used during the final stage of selection. Paper and pencil interviews had to be used for 730 completes to minimize security concerns due to the Taliban takeover. |
| Albania                | Jun 29 – Aug 26, 2021       | 1000        | Face-to-Face                      | Albanian                        | People living in remote or difficult-to- access rural areas were excluded. The excluded area represents approximately 2% of the population.                                                   |
| Algeria                | Jul 9 – Aug 19, 2021        | 1005        | Landline and Mobile Telephone     | Arabic                          |                                                                                                                                                                                               |
| Argentina              | Jul 9 – Sep 2, 2021         | 1000        | Landline and Mobile Telephone     | Spanish                         |                                                                                                                                                                                               |
| Armenia                | Aug 5 – Dec 12, 2021        | 1002        | Face-to-Face                      | Armenian                        | Settlements near territories disputed with Azerbaijan were not included for insecurity reasons. The excluded area represents approximately 3% of the population.                              |
| Australia              | May 3 – Jun 18, 2021        | 1000        | Landline and Mobile Telephone     | English                         |                                                                                                                                                                                               |
| Austria                | May 3 – Jun 7, 2021         | 1000        | Landline and Mobile Telephone     | German                          |                                                                                                                                                                                               |
| Bangladesh             | Feb 27 – Mar 30, 2022       | 1000        | Face-to-Face                      | Bengali                         |                                                                                                                                                                                               |
| Belgium                | Sep 16, 2021 – Jan 21, 2022 | 1010        | Landline and Mobile Telephone     | French, Flemish                 |                                                                                                                                                                                               |
| Benin                  | Jul 26 – Aug 12, 2021       | 1000        | Face-to-Face                      | Bariba, Fon, French             |                                                                                                                                                                                               |
| Bolivia                | Jul 11 – Jul 31, 2021       | 1004        | Mobile Telephone                  | Spanish                         |                                                                                                                                                                                               |
| Bosnia and Herzegovina | Jul 16 – Sep 11, 2021       | 1000        | Landline and Mobile Telephone     | Bosnian                         |                                                                                                                                                                                               |
| Botswana               | Sep 25 – Oct 21, 2022       | 1003        | Face-to-Face                      | English, Setswana               | Sampling units of population size less than 50 are excluded from the sampling frame. This exclusion is approximately 4% of the population of Botswana.                                        |
| Brazil                 | Aug 3 – Nov 7, 2021         | 1005        | Landline and Mobile Telephone     | Portuguese                      |                                                                                                                                                                                               |
| Bulgaria               | Jun 4 – Jul 17, 2021        | 1005        | Landline and Mobile Telephone     | Bulgarian                       |                                                                                                                                                                                               |
| Burkina Faso           | Aug 16 – Sep 8, 2021        | 1000        | Face-to-Face                      | Dioula, French, Fulfulde, Moore |                                                                                                                                                                                               |



Table S15: Overview of country samples and interview modes

| Country             | Date of data collection    | Sample size | Interview mode                | Languages                 | Exceptions                                                                                                                                                                                                                                                               |
|---------------------|----------------------------|-------------|-------------------------------|---------------------------|--------------------------------------------------------------------------------------------------------------------------------------------------------------------------------------------------------------------------------------------------------------------------|
| Cambodia            | Aug 28 – Oct 5, 2021       | 1000        | Face-to-Face                  | Khmer                     | Koh Kong, Stueng Treng, Otdor Meanchey, and Kep provinces were excluded. These excluded areas represent approximately 3% of the population of Cambodia.                                                                                                                  |
| Cameroon            | Jun 8 – Jul 2, 2021        | 1000        | Face-to-Face                  | French, English, Fulfulde | Some arrondissements in the Extreme North region, the Northwest region, and the South West region were excluded due to insecurity. Neighborhoods with less than 50 household were also excluded from the sampling. The exclusion represents 20% of the total population. |
| Canada              | May 18 – Jul 6, 2021       | 1008        | Landline and Mobile Telephone | English, French           | Northwest Territories, Yukon and Nunavut (representing approximately 0.3% of the Canadian population) were excluded.                                                                                                                                                     |
| Chile               | Aug 19 – Dec 23, 2021      | 1001        | Face-to-Face                  | Spanish                   |                                                                                                                                                                                                                                                                          |
| China               | Dec 6, 2021 – Jan 22, 2022 | 3500        | Mobile Telephone              | Chinese                   | Tibet was excluded from the sample. The excluded areas represent less than 1% of the population of China.                                                                                                                                                                |
| Colombia            | Jul 16 – Aug 19, 2021      | 1000        | Landline and Mobile Telephone | Spanish                   |                                                                                                                                                                                                                                                                          |
| Congo - Brazzaville | Jun 25 – Jul 21, 2021      | 1000        | Face-to-Face                  | French, Kituba, Lingala   |                                                                                                                                                                                                                                                                          |
| Costa Rica          | Jul 13 – Aug 15, 2021      | 1001        | Landline and Mobile Telephone | Spanish                   |                                                                                                                                                                                                                                                                          |
| Côte d'Ivoire       | Oct 28 – Nov 28, 2021      | 1000        | Face-to-Face                  | French, Dioula            |                                                                                                                                                                                                                                                                          |
| Croatia             | Jun 18 – Jul 28, 2021      | 1002        | Landline and Mobile Telephone | Croatian                  |                                                                                                                                                                                                                                                                          |
| Cyprus              | Apr 22 – Jul 4, 2021       | 1019        | Landline and Mobile Telephone | Greek, English            |                                                                                                                                                                                                                                                                          |
| Czechia             | Jun 9 – Aug 10, 2021       | 1008        | Landline and Mobile Telephone | Czech                     |                                                                                                                                                                                                                                                                          |
| Denmark             | Jun 1- Jul 18, 2021        | 1010        | Mobile Telephone              | Danish                    |                                                                                                                                                                                                                                                                          |
| Dominican Republic  | Aug 1 – Sep 15, 2021       | 1001        | Face-to-Face                  | Spanish                   |                                                                                                                                                                                                                                                                          |
| Ecuador             | Jul 23 – Sep 1, 2021       | 1000        | Landline and Mobile Telephone | Spanish                   |                                                                                                                                                                                                                                                                          |

Table S15: Overview of country samples and interview modes

| Country             | Date of data collection | Sample size | Interview mode                | Languages                         | Exceptions                                                                                                                                                                                                                                                  |
|---------------------|-------------------------|-------------|-------------------------------|-----------------------------------|-------------------------------------------------------------------------------------------------------------------------------------------------------------------------------------------------------------------------------------------------------------|
| Egypt               | Sep 4 – Sep 22, 2021    | 1002        | Face-to-Face                  | Arabic                            | Frontier governorates (Matruh, Red Sea, New Valley, North Sinai, and South Sinai) were excluded, as they are remote and represent a small proportion of the population of the country. The excluded areas represent less than 2% of the total population.   |
| El Salvador         | Sep 16 – Nov 24, 2021   | 1001        | Face-to-Face                  | Spanish                           |                                                                                                                                                                                                                                                             |
| Estonia             | May 31 – Jun 21, 2021   | 1024        | Mobile Telephone              | Estonian, Russian                 |                                                                                                                                                                                                                                                             |
| Finland             | Apr 13 – Jun 14, 2021   | 1005        | Mobile Telephone              | Finnish, Swedish                  |                                                                                                                                                                                                                                                             |
| France              | May 3 – Jun 16, 2021    | 1000        | Landline and Mobile Telephone | French                            |                                                                                                                                                                                                                                                             |
| Gabon               | Oct 3 – Oct 30, 2021    | 1000        | Mobile Telephone              | French, Fang                      |                                                                                                                                                                                                                                                             |
| Georgia             | Jul 29 – Dec 5, 2021    | 1001        | Face-to-Face                  | Georgian, Russian                 | South Ossetia and Abkhazia were not included for the safety of the interviewers. In addition, very remote mountainous villages or those with less than 100 inhabitants were also excluded. The excluded area represents approximately 8% of the population. |
| Germany             | May 3 – Jun 10, 2021    | 1000        | Landline and Mobile Telephone | German                            |                                                                                                                                                                                                                                                             |
| Ghana               | Jul 27 – Sep 6, 2021    | 1000        | Face-to-Face                  | English, Ewe, Twi, Dagbani, Hausa | Localities with less than 100 inhabitants were excluded from the sample. The excluded areas represent approximately 4% of the population.                                                                                                                   |
| Greece              | May 31 – Jun 30, 2021   | 1006        | Landline and Mobile Telephone | Greek                             |                                                                                                                                                                                                                                                             |
| Guatemala           | Jun 29 – Oct 17, 2022   | 1000        | Face-to-Face                  | Spanish                           |                                                                                                                                                                                                                                                             |
| Guinea              | Sep 4 – Sep 25, 2021    | 1000        | Face-to-Face                  | French, Malinke, Pular, Soussou   |                                                                                                                                                                                                                                                             |
| Honduras            | Sep 21 – Dec 20, 2021   | 1005        | Face-to-Face                  | Spanish                           |                                                                                                                                                                                                                                                             |
| Hong Kong SAR China | Jun 11 – Aug 15, 2021   | 1007        | Landline and Mobile Telephone | Chinese                           |                                                                                                                                                                                                                                                             |
| Hungary             | Jun 16 – Jul 27, 2021   | 1000        | Landline and Mobile Telephone | Hungarian                         |                                                                                                                                                                                                                                                             |
| Iceland             | Jun 2 – Jul 26, 2021    | 500         | Landline and Mobile Telephone | Icelandic                         |                                                                                                                                                                                                                                                             |

Table S15: Overview of country samples and interview modes

| Country    | Date of data collection | Sample size | Interview mode                | Languages                                                                                     | Exceptions                                                                                                                                                                                                                                                 |
|------------|-------------------------|-------------|-------------------------------|-----------------------------------------------------------------------------------------------|------------------------------------------------------------------------------------------------------------------------------------------------------------------------------------------------------------------------------------------------------------|
| India      | Jul 29 – Oct 14, 2021   | 3000        | Face-to-Face                  | Assamese, Bengali, Gujarati, Hindi, Kannada, Malayalam, Marathi, Odia, Punjabi, Tamil, Telugu | Excluded population living in Northeast states and remote islands, and Jammu and Kashmir. The excluded areas represent less than 10% of the population.                                                                                                    |
| Indonesia  | Jul 8 – Oct 16, 2021    | 1063        | Face-to-Face                  | Bahasa Indonesia                                                                              |                                                                                                                                                                                                                                                            |
| Iran       | Aug 24 – Aug 31, 2021   | 1011        | Landline and Mobile Telephone | Farsi                                                                                         |                                                                                                                                                                                                                                                            |
| Iraq       | Nov 1 – Dec 6, 2021     | 1002        | Face-to-Face and Face-to-Face | Arabic, Kurdish                                                                               |                                                                                                                                                                                                                                                            |
| Ireland    | May 4 – Jun 8, 2021     | 1000        | Landline and Mobile Telephone | English                                                                                       |                                                                                                                                                                                                                                                            |
| Israel     | Aug 15 – Nov 26, 2021   | 1001        | Face-to-Face                  | Hebrew, Arabic                                                                                | The sample does not include the area of East Jerusalem. This area included in the sample of Palestinian Territories.                                                                                                                                       |
| Italy      | May 3 – Jun 14, 2021    | 1000        | Landline and Mobile Telephone | Italian                                                                                       |                                                                                                                                                                                                                                                            |
| Jamaica    | Sep 18 – Nov 9, 2021    | 505         | Face-to-Face                  | English                                                                                       |                                                                                                                                                                                                                                                            |
| Japan      | Jun 11 – Aug 16, 2021   | 1007        | Landline and Mobile Telephone | Japanese                                                                                      | Landline RDD, excluded 12 municipalities near the nuclear power plant in Fukushima. These areas were designated as not-to-call districts due to the devastation from the 2011 disasters. The exclusion represents less than 1% of the population of Japan. |
| Jordan     | Sep 1 – Sep 27, 2021    | 1000        | Mobile Telephone              | Arabic                                                                                        |                                                                                                                                                                                                                                                            |
| Kazakhstan | Sep 4 – Oct 19, 2021    | 1000        | Face-to-Face                  | Russian, Kazakh                                                                               |                                                                                                                                                                                                                                                            |
| Kenya      | Jun 19 – Jul 21, 2021   | 1000        | Face-to-Face                  | English, Swahili                                                                              |                                                                                                                                                                                                                                                            |
| Kosovo     | Jul 3 – Sep 30, 2021    | 1000        | Face-to-Face                  | Albanian, Serbian                                                                             |                                                                                                                                                                                                                                                            |
| Kyrgyzstan | Aug 26 – Oct 4, 2021    | 1001        | Face-to-Face                  | Kyrgyz, Russian, Uzbek                                                                        |                                                                                                                                                                                                                                                            |

Table S15: Overview of country samples and interview modes

| Country    | Date of data collection | Sample size | Interview mode                | Languages                      | Exceptions                                                                                                                                                                                                                                                                                             |
|------------|-------------------------|-------------|-------------------------------|--------------------------------|--------------------------------------------------------------------------------------------------------------------------------------------------------------------------------------------------------------------------------------------------------------------------------------------------------|
| Laos       | Aug 30 – Dec 14, 2021   | 1000        | Face-to-Face                  | Lao                            | Excluded Xaisomboun Province, Xayaboury Province and some communes that are unreachable and/or have security considerations. In addition, during fieldwork Attapu and Houaphan were also excluded due to COVID (COVID-19 red zones). The excluded areas represent approximately 14% of the population. |
| Latvia     | Jun 11 – Jul 11, 2021   | 1017        | Mobile Telephone              | Latvian, Russian               |                                                                                                                                                                                                                                                                                                        |
| Lebanon    | Aug 10 – Aug 28, 2021   | 1000        | Landline and Mobile Telephone | Arabic                         |                                                                                                                                                                                                                                                                                                        |
| Lithuania  | Jul 8 – Aug 31, 2021    | 1009        | Landline and Mobile Telephone | Lithuanian                     |                                                                                                                                                                                                                                                                                                        |
| Madagascar | Jun 16 – Jul 24, 2022   | 1000        | Face-to-Face                  | French, Malagasy               | Regions that were unsafe or unreachable were excluded from the sample. The excluded areas represent approximately 17% of the total population.                                                                                                                                                         |
| Malawi     | Jul 31 – Aug 13, 2021   | 1000        | Face-to-Face                  | Chichewa, English, Tumbuka     |                                                                                                                                                                                                                                                                                                        |
| Malaysia   | June 10 – Nov 25, 2021  | 1000        | Landline and Mobile Telephone | Bahasa Malay, Chinese, English |                                                                                                                                                                                                                                                                                                        |
| Mali       | Jul 15 - Jul 31, 2021   | 1000        | Face-to-Face                  | French, Bambara                | The regions of Gao, Kidal, Mopti and Tombouctou were excluded because of insecurity. Quartiers and villages with less than 50 inhabitants were also excluded from the sample. The excluded areas represent 23% of the total population.                                                                |
| Malta      | Apr 11 – Jul 21, 2021   | 1001        | Landline and Mobile Telephone | Maltese, English               |                                                                                                                                                                                                                                                                                                        |
| Mauritius  | Apr 24 – Jun 14, 2021   | 1000        | Landline and Mobile Telephone | Creole, English, French        |                                                                                                                                                                                                                                                                                                        |
| Mexico     | Jul 14 – Aug 27, 2021   | 1000        | Landline and Mobile Telephone | Spanish                        |                                                                                                                                                                                                                                                                                                        |
| Moldova    | Jul 13 – Sep 10, 2021   | 1000        | Face-to-Face                  | Romanian/ Moldavian, Russian   | Transnistria (Prednestrovie) excluded for safety of interviewers. The excluded area represents approximately 13% of the population.                                                                                                                                                                    |
| Mongolia   | Aug 20 – Oct 12, 2021   | 1000        | Face-to-Face                  | Mongolian                      |                                                                                                                                                                                                                                                                                                        |
| Morocco    | Jul 10 – Aug 7, 2021    | 1001        | Mobile Telephone              | Moroccan Arabic                |                                                                                                                                                                                                                                                                                                        |

Table S15: Overview of country samples and interview modes

| Country         | Date of data collection | Sample size | Interview mode                | Languages                                    | Exceptions                                                                                                                                                                    |
|-----------------|-------------------------|-------------|-------------------------------|----------------------------------------------|-------------------------------------------------------------------------------------------------------------------------------------------------------------------------------|
| Mozambique      | Oct 28 – Dec 20, 2021   | 1000        | Face-to-Face                  | Portuguese, Xi-changana, Emakhuwa            | Cabo Delgado province, as well as a small number of districts in other provinces, were excluded due to insecurity. The excluded areas represent 11% of population.            |
| Myanmar (Burma) | Sep 22 – Oct 15, 2021   | 1000        | Mobile Telephone              | Burmese                                      |                                                                                                                                                                               |
| Namibia         | Aug 29 – Oct 10, 2021   | 1001        | Face-to-Face                  | English, Oshivambo, Afrikaans                |                                                                                                                                                                               |
| Nepal           | Sep 9 – Nov 18, 2021    | 1000        | Face-to-Face                  | Nepali                                       |                                                                                                                                                                               |
| Netherlands     | Apr 13 – Jul 9, 2021    | 1000        | Landline and Mobile Telephone | Dutch                                        |                                                                                                                                                                               |
| New Zealand     | Apr 19 – Jun 4, 2021    | 1000        | Landline and Mobile Telephone | English                                      |                                                                                                                                                                               |
| Nicaragua       | Sep 15 – Nov 22, 2021   | 1010        | Face-to-Face                  | Spanish                                      |                                                                                                                                                                               |
| Nigeria         | Jul 15 – Aug 22, 2021   | 1000        | Face-to-Face                  | English, Hausa, Igbo, Pidgin English, Yoruba | The states of Adamawa, Borno and Yobe were excluded for safety and security reasons. These states represent 7% of the population.                                             |
| North Macedonia | Jul 14 – Aug 29, 2021   | 1024        | Landline and Mobile Telephone | Macedonian, Albanian                         |                                                                                                                                                                               |
| Norway          | May 7 – Jun 22, 2021    | 1007        | Mobile Telephone              | Norwegian                                    |                                                                                                                                                                               |
| Pakistan        | Oct 13 – Dec 15, 2021   | 1000        | Face-to-Face                  | Urdu                                         | Did not include AJK, Gilgit-Baltistan. The excluded area represents approximately 5% of the population. Gender-matched sampling was used during the final stage of selection. |
| Panama          | Oct 4 – Dec 17, 2021    | 1003        | Face-to-Face                  | Spanish                                      |                                                                                                                                                                               |
| Paraguay        | Sep 1 - Oct 12, 2021    | 1001        | Face-to-Face                  | Spanish, Jopara                              |                                                                                                                                                                               |
| Peru            | Aug 22 – Oct 21, 2021   | 1000        | Face-to-Face                  | Spanish                                      |                                                                                                                                                                               |
| Philippines     | Jun 11 – Aug 13, 2021   | 1000        | Mobile Telephone              | Filipino, Iluko, Cebuano, Waray, Bicol       |                                                                                                                                                                               |
| Poland          | Jun 8 – Jul 7, 2021     | 1001        | Landline and Mobile Telephone | Polish                                       |                                                                                                                                                                               |
| Portugal        | Apr 27 – Jun 8, 2021    | 1002        | Landline and Mobile Telephone | Portuguese                                   |                                                                                                                                                                               |
| Romania         | Jun 23 – Jul 29, 2021   | 1009        | Landline and Mobile Telephone | Romanian                                     |                                                                                                                                                                               |

Table S15: Overview of country samples and interview modes

| Country      | Date of data collection | Sample size | Interview mode                | Languages                              | Exceptions                                                                                                                  |
|--------------|-------------------------|-------------|-------------------------------|----------------------------------------|-----------------------------------------------------------------------------------------------------------------------------|
| Russia       | May 14 – Jul 14, 2021   | 2001        | Landline and Mobile Telephone | Russian                                |                                                                                                                             |
| Saudi Arabia | May 23 – Jun 6, 2021    | 1008        | Landline and Mobile Telephone | Arabic, English, Hindi, Urdu           | Includes Saudis, Arab expatriates, and non-Arabs who were able to complete the interview in Arabic, English, Urdu or Hindi. |
| Senegal      | Aug 17 – Sep 10, 2021   | 1000        | Face-to-Face                  | French, Wolof                          |                                                                                                                             |
| Serbia       | Jun 8 – Jul 25, 2021    | 1000        | Landline and Mobile Telephone | Serbian                                |                                                                                                                             |
| Sierra Leone | Jun 15 – Jul 16, 2021   | 1000        | Face-to-Face                  | English, Krio, Mende                   |                                                                                                                             |
| Singapore    | Jun 7 – Sep 20, 2021    | 1000        | Landline and Mobile Telephone | English, Chinese, Bahasa Malay         |                                                                                                                             |
| Slovakia     | Jun 30 – Jul 29, 2021   | 1003        | Landline and Mobile Telephone | Hungarian, Slovak                      |                                                                                                                             |
| Slovenia     | Aug 26 – Sep 28, 2021   | 1001        | Landline and Mobile Telephone | Slovene                                |                                                                                                                             |
| South Africa | Aug 5 – Nov 9, 2021     | 1032        | Face-to-Face                  | Afrikaans, English, Sotho, Xhosa, Zulu |                                                                                                                             |
| South Korea  | Jun 23 – Aug 11, 2021   | 1001        | Landline and Mobile Telephone | Korean                                 |                                                                                                                             |
| Spain        | May 3– Jun 14, 2021     | 1000        | Landline and Mobile Telephone | Spanish                                |                                                                                                                             |
| Sri Lanka    | Oct 20 – Dec 1, 2021    | 1005        | Mobile Telephone              | Sinhala, Tamil                         |                                                                                                                             |
| Sweden       | May 10 – Jun 14, 2021   | 1010        | Landline and Mobile Telephone | Swedish                                |                                                                                                                             |
| Switzerland  | May 3 – Jun 10, 2021    | 1000        | Landline and Mobile Telephone | German, French, Italian                |                                                                                                                             |
| Taiwan       | May 31 – Jul 6, 2021    | 1000        | Landline and Mobile Telephone | Chinese                                |                                                                                                                             |
| Tajikistan   | Aug 18 – Oct 11, 2021   | 1000        | Face-to-Face                  | Tajik                                  |                                                                                                                             |
| Tanzania     | Aug 2 – Aug 28, 2021    | 1000        | Face-to-Face                  | Swahili                                |                                                                                                                             |
| Thailand     | Sep 19 – Nov 9, 2021    | 1006        | Mobile Telephone              | Thai                                   |                                                                                                                             |
| Togo         | Sep 4 – Sep 22, 2021    | 1000        | Face-to-Face                  | French, Ewe                            |                                                                                                                             |
| Tunisia      | Sep 24 – Oct 16, 2021   | 1000        | Face-to-Face                  | Arabic                                 |                                                                                                                             |

Table S15: Overview of country samples and interview modes

| Country              | Date of data collection | Sample size | Interview mode                | Languages                           | Exceptions                                                                                                                                                         |
|----------------------|-------------------------|-------------|-------------------------------|-------------------------------------|--------------------------------------------------------------------------------------------------------------------------------------------------------------------|
| Turkey               | Aug 9 – Sep 8, 2021     | 1000        | Landline and Mobile Telephone | Turkish                             |                                                                                                                                                                    |
| Uganda               | Sep 12 – Oct 3, 2021    | 1000        | Face-to-Face                  | Ateso, English, Luganda, Runyankole | Three districts in the North region were excluded for security reasons – Kotido, Moroto, Nakapiripirit. The excluded areas represent 2% or less of the population. |
| Ukraine              | Jul 7 – Jul 19, 2021    | 1000        | Landline and Mobile Telephone | Russian, Ukrainian                  |                                                                                                                                                                    |
| United Arab Emirates | May 30 – Jun 29, 2021   | 1002        | Mobile Telephone              | Arabic, English, Hindi, Urdu        | Includes only Emiratis, Arab expatriates and non Arabs who were able to complete the interview in Arabic, English, Urdu or Hindi.                                  |
| United Kingdom       | May 4 – Jun 9, 2021     | 1000        | Landline and Mobile Telephone | English                             |                                                                                                                                                                    |
| United States        | Apr 22 – Jun 21, 2021   | 1005        | Landline and Mobile Telephone | English, Spanish                    |                                                                                                                                                                    |
| Uruguay              | Aug 24 – Dec 1, 2021    | 1000        | Face-to-Face                  | Spanish                             |                                                                                                                                                                    |
| Uzbekistan           | Aug 12 – Oct 6, 2021    | 1000        | Face-to-Face                  | Uzbek, Russian                      |                                                                                                                                                                    |
| Venezuela            | Jul 26 – Sep 14, 2021   | 1000        | Landline and Mobile Telephone | Spanish                             |                                                                                                                                                                    |
| Vietnam              | Sep 25 – Oct 27, 2021   | 1020        | Mobile Telephone              | Vietnamese                          |                                                                                                                                                                    |
| Zambia               | Aug 31 – Sep 28, 2021   | 1000        | Face-to-Face                  | Bemba, English, Lozi, Nyanja, Tonga |                                                                                                                                                                    |
| Zimbabwe             | Jun 26 – Aug 8, 2021    | 1000        | Face-to-Face                  | English, Shona, Ndebele             |                                                                                                                                                                    |

Table S16: Global statistics are insensitive to the choice of weights

|                                                           | Gallup sampling weights<br>(1) | Population-adjusted weights<br>(2) | Unweighted average<br>(3) |
|-----------------------------------------------------------|--------------------------------|------------------------------------|---------------------------|
| Respondents willing to contribute 1% of their income      | 70%                            | 69%                                | 70%                       |
| Respondents willing to contribute a smaller amount        | 6%                             | 6%                                 | 6%                        |
| Respondents not willing to contribute anything            | 24%                            | 26%                                | 24%                       |
| Respondents approving of pro-climate norms                | 86%                            | 86%                                | 87%                       |
| Respondents' demand for political action                  | 89%                            | 89%                                | 89%                       |
| Average belief about others' willingness to contribute 1% | 41%                            | 43%                                | 40%                       |
| Average individual perception gap                         | 29%                            | 26%                                | 29%                       |
| Respondents underestimating the actual WTC 1%             | 81%                            | 79%                                | 82%                       |
| Respondents underestimating the actual WTC 1% by 10 pp    | 73%                            | 71%                                | 74%                       |

*Notes:* This table derives all global summary statistics cited in the main text with two different weighting procedures. Column 1 presents statistics obtained by weighting individual respondents with Gallup's sampling weights to account for the stratified random sampling procedure. Column 2 presents each statistic when additionally adjusting for population shares. Column 3 presents unweighted averages. Starting from Gallup's sampling weights, these weights are adjusted to give each country sample a total weight proportional to its share of the global population. Population-adjusted weights are used in the main text when we describe the data at the supranational level.



Table S17: Share of missing data by country

| Country            | Willingness to contribute 1% | Approval of pro-climate norms | Demand for political action | Beliefs about others' WTC |
|--------------------|------------------------------|-------------------------------|-----------------------------|---------------------------|
| Afghanistan        | 2.6                          | 4.2                           | 3.8                         | 9.9                       |
| Albania            | 4.9                          | 6.1                           | 4.3                         | 9.9                       |
| Algeria            | 7.7                          | 12.4                          | 10.1                        | 17.9                      |
| Argentina          | 1.3                          | 1.4                           | 1.7                         | 7.1                       |
| Armenia            | 5.9                          | 11.7                          | 13.3                        | 33.4                      |
| Australia          | 0.9                          | 0.8                           | 1.3                         | 5.7                       |
| Austria            | 0.7                          | 1.1                           | 1.4                         | 2.3                       |
| Bangladesh         | 13.8                         | 17.9                          | 12.7                        | 32.5                      |
| Belgium            | 1.9                          | 1.9                           | 1.9                         | 6.7                       |
| Benin              | 2.4                          | 3.3                           | 3.1                         | 12.4                      |
| Bolivia            | 3.1                          | 0.9                           | 0.7                         | 11.0                      |
| Bosnia Herzegovina | 3.0                          | 2.4                           | 3.1                         | 8.2                       |
| Botswana           | 2.2                          | 4.5                           | 2.8                         | 9.3                       |
| Brazil             | 0.9                          | 0.7                           | 0.6                         | 5.1                       |
| Bulgaria           | 1.4                          | 2.3                           | 2.0                         | 7.2                       |
| Burkina Faso       | 3.4                          | 3.3                           | 3.8                         | 10.0                      |
| Cambodia           | 5.3                          | 15.7                          | 25.2                        | 39.5                      |
| Cameroon           | 2.1                          | 4.6                           | 4.0                         | 13.0                      |
| Canada             | 1.0                          | 1.0                           | 0.8                         | 2.6                       |
| Chile              | 11.2                         | 3.4                           | 2.2                         | 17.9                      |
| China              | 0.8                          | 1.5                           | 1.7                         | 3.4                       |
| Colombia           | 0.8                          | 0.7                           | 0.5                         | 5.0                       |
| Congo Brazzaville  | 9.7                          | 7.9                           | 6.6                         | 28.3                      |
| Costa Rica         | 1.8                          | 1.2                           | 1.3                         | 11.9                      |
| Croatia            | 3.7                          | 2.1                           | 3.8                         | 15.1                      |
| Cyprus             | 2.3                          | 1.5                           | 2.1                         | 8.2                       |
| Czech Republic     | 5.2                          | 5.0                           | 7.4                         | 8.1                       |
| Denmark            | 1.2                          | 1.0                           | 1.3                         | 2.1                       |
| Dominican Republic | 1.7                          | 4.6                           | 4.5                         | 28.5                      |
| Ecuador            | 2.0                          | 1.1                           | 1.1                         | 11.8                      |
| Egypt              | 6.5                          | 24.5                          | 20.4                        | 25.5                      |
| El Salvador        | 15.1                         | 13.4                          | 14.3                        | 37.3                      |
| Estonia            | 3.7                          | 6.0                           | 8.7                         | 9.5                       |
| Finland            | 1.7                          | 0.5                           | 2.0                         | 1.8                       |
| France             | 1.9                          | 0.2                           | 0.6                         | 6.3                       |
| Gabon              | 0.7                          | 1.0                           | 1.3                         | 9.6                       |
| Georgia            | 5.3                          | 9.7                           | 8.7                         | 19.1                      |
| Germany            | 1.0                          | 0.5                           | 0.6                         | 2.0                       |
| Ghana              | 3.4                          | 5.2                           | 3.8                         | 13.4                      |
| Greece             | 0.9                          | 0.9                           | 0.5                         | 2.6                       |
| Guatemala          | 6.4                          | 6.3                           | 4.8                         | 19.6                      |
| Guinea             | 2.4                          | 4.2                           | 3.4                         | 14.4                      |
| Honduras           | 5.3                          | 6.3                           | 4.6                         | 28.5                      |
| Hong Kong          | 0.4                          | 0.4                           | 1.0                         | 1.5                       |

Table S17: Share of missing data by country

| Country         | Willingness to contribute 1% | Approval of pro-climate norms | Demand for political action | Beliefs about others' WTC |
|-----------------|------------------------------|-------------------------------|-----------------------------|---------------------------|
| Hungary         | 1.9                          | 1.6                           | 5.6                         | 4.9                       |
| Iceland         | 3.0                          | 2.0                           | 3.6                         | 8.6                       |
| India           | 12.3                         | 16.2                          | 15.6                        | 29.2                      |
| Indonesia       | 5.6                          | 10.3                          | 8.9                         | 12.7                      |
| Iran            | 0.9                          | 0.8                           | 1.7                         | 3.6                       |
| Iraq            | 0.8                          | 2.5                           | 2.4                         | 3.3                       |
| Ireland         | 0.2                          | 0.2                           | 0.2                         | 1.2                       |
| Israel          | 9.2                          | 14.6                          | 10.5                        | 20.8                      |
| Italy           | 0.9                          | 0.4                           | 0.8                         | 1.0                       |
| Ivory Coast     | 1.7                          | 1.7                           | 1.8                         | 2.8                       |
| Jamaica         | 15.0                         | 21.6                          | 20.4                        | 34.3                      |
| Japan           | 3.1                          | 3.8                           | 4.7                         | 7.0                       |
| Jordan          | 4.6                          | 10.5                          | 10.8                        | 12.2                      |
| Kazakhstan      | 14.3                         | 22.2                          | 16.0                        | 29.3                      |
| Kenya           | 1.4                          | 2.0                           | 1.0                         | 6.0                       |
| Kosovo          | 7.1                          | 7.0                           | 6.9                         | 13.0                      |
| Kyrgyzstan      | 8.8                          | 8.7                           | 7.7                         | 24.3                      |
| Laos            | 8.6                          | 12.4                          | 16.5                        | 31.8                      |
| Latvia          | 5.3                          | 3.9                           | 4.1                         | 10.5                      |
| Lebanon         | 2.7                          | 5.3                           | 4.8                         | 14.8                      |
| Lithuania       | 12.3                         | 9.0                           | 8.6                         | 27.0                      |
| Madagascar      | 1.8                          | 1.7                           | 0.9                         | 8.9                       |
| Malawi          | 0.4                          | 0.5                           | 1.0                         | 6.8                       |
| Malaysia        | 7.3                          | 5.5                           | 4.8                         | 12.5                      |
| Mali            | 2.0                          | 2.8                           | 2.6                         | 7.2                       |
| Malta           | 1.3                          | 0.9                           | 1.3                         | 4.0                       |
| Mauritius       | 1.7                          | 2.8                           | 1.8                         | 4.1                       |
| Mexico          | 2.4                          | 1.1                           | 0.8                         | 9.9                       |
| Moldova         | 6.1                          | 9.8                           | 6.6                         | 16.6                      |
| Mongolia        | 1.5                          | 3.1                           | 3.8                         | 11.4                      |
| Morocco         | 3.8                          | 8.0                           | 8.2                         | 20.0                      |
| Mozambique      | 4.3                          | 7.2                           | 6.2                         | 26.3                      |
| Myanmar         | 0.6                          | 0.9                           | 100.0                       | 1.6                       |
| Namibia         | 0.9                          | 2.0                           | 1.7                         | 9.5                       |
| Nepal           | 4.9                          | 11.2                          | 9.8                         | 14.5                      |
| Netherlands     | 0.1                          | 0.2                           | 0.0                         | 1.2                       |
| New Zealand     | 0.5                          | 0.5                           | 0.8                         | 5.5                       |
| Nicaragua       | 6.9                          | 7.3                           | 7.2                         | 19.4                      |
| Nigeria         | 4.0                          | 11.9                          | 8.6                         | 20.9                      |
| North Macedonia | 2.9                          | 1.9                           | 2.9                         | 14.5                      |
| Norway          | 0.1                          | 0.0                           | 0.5                         | 0.7                       |
| Pakistan        | 7.6                          | 18.2                          | 13.7                        | 16.5                      |
| Panama          | 6.7                          | 5.4                           | 3.9                         | 24.3                      |
| Paraguay        | 6.9                          | 10.3                          | 7.2                         | 27.6                      |

Table S17: Share of missing data by country

| Country              | Willingness to contribute 1% | Approval of pro-climate norms | Demand for political action | Beliefs about others' WTC |
|----------------------|------------------------------|-------------------------------|-----------------------------|---------------------------|
| Peru                 | 3.8                          | 2.5                           | 2.0                         | 15.6                      |
| Philippines          | 0.5                          | 0.3                           | 0.2                         | 0.7                       |
| Poland               | 0.9                          | 2.6                           | 2.7                         | 0.0                       |
| Portugal             | 2.3                          | 1.3                           | 1.7                         | 9.9                       |
| Romania              | 8.6                          | 7.5                           | 5.6                         | 24.5                      |
| Russia               | 0.4                          | 1.2                           | 1.1                         | 3.8                       |
| Saudi Arabia         | 0.7                          | 2.2                           | 100.0                       | 1.6                       |
| Senegal              | 2.6                          | 5.4                           | 4.6                         | 18.4                      |
| Serbia               | 3.5                          | 2.5                           | 4.2                         | 3.1                       |
| Sierra Leone         | 8.7                          | 15.8                          | 14.0                        | 33.3                      |
| Singapore            | 5.4                          | 4.9                           | 4.0                         | 11.7                      |
| Slovakia             | 0.6                          | 1.2                           | 2.3                         | 3.8                       |
| Slovenia             | 0.6                          | 0.6                           | 1.2                         | 2.7                       |
| South Africa         | 8.5                          | 16.2                          | 9.1                         | 18.3                      |
| South Korea          | 2.0                          | 0.8                           | 0.7                         | 7.8                       |
| Spain                | 0.1                          | 0.0                           | 0.1                         | 2.7                       |
| Sri Lanka            | 5.1                          | 3.9                           | 4.0                         | 16.3                      |
| Sweden               | 0.2                          | 0.1                           | 0.7                         | 0.7                       |
| Switzerland          | 0.2                          | 1.2                           | 0.4                         | 3.8                       |
| Taiwan               | 6.5                          | 5.2                           | 3.1                         | 15.2                      |
| Tajikistan           | 10.3                         | 15.1                          | 9.8                         | 24.9                      |
| Tanzania             | 3.5                          | 9.2                           | 6.9                         | 30.0                      |
| Thailand             | 6.4                          | 1.6                           | 3.3                         | 12.3                      |
| Togo                 | 3.9                          | 6.0                           | 4.0                         | 17.0                      |
| Tunisia              | 5.2                          | 15.2                          | 13.1                        | 17.3                      |
| Turkey               | 4.2                          | 3.6                           | 4.8                         | 12.1                      |
| Uganda               | 1.3                          | 2.7                           | 2.2                         | 9.6                       |
| Ukraine              | 3.6                          | 4.8                           | 5.3                         | 10.6                      |
| United Arab Emirates | 10.0                         | 11.0                          | 100.0                       | 24.2                      |
| United Kingdom       | 0.9                          | 0.3                           | 0.2                         | 4.1                       |
| United States        | 0.3                          | 0.8                           | 0.6                         | 1.7                       |
| Uruguay              | 2.9                          | 4.4                           | 5.6                         | 16.7                      |
| Uzbekistan           | 4.1                          | 6.1                           | 5.5                         | 18.7                      |
| Venezuela            | 0.4                          | 0.2                           | 0.4                         | 3.0                       |
| Vietnam              | 8.4                          | 2.5                           | 5.1                         | 10.0                      |
| Zambia               | 14.8                         | 16.4                          | 12.3                        | 41.1                      |
| Zimbabwe             | 0.8                          | 2.2                           | 2.2                         | 6.2                       |

*Notes:* This table presents the share of missing data for the willingness to contribute 1% of one's household income, the approval of pro-climate norms, the demand for political action, and beliefs about others' willingness to contribute. Across all countries, the share of missing data for these variables is as follows: willingness to contribute 1% of one's household income (4.0%), the approval of pro-climate norms (5.2%), the demand for political action (7.1%), beliefs about others' willingness to contribute (12.8%).
